# Supplementary material for: Label-free detection of aggregated platelets in blood by machine-learning-aided optofluidic time-stretch microscopy
Source: Royal Society of Chemistry journal article supplement (doi:10.1039/c7lc00396j), 2017-01-01
Supplement: c7lc00396j1.pdf [file c7lc00396j1.pdf]

## Supplementary Information

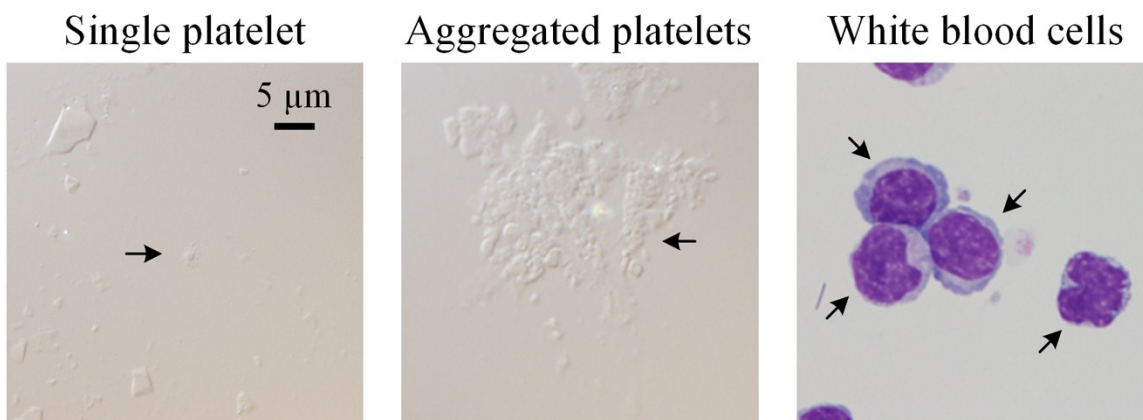

**Supplementary Figure 1. Bright-field images of a single platelet, aggregated platelets, and white blood cells under a conventional microscope.** The white blood cells were stained with May Giemsa. The black arrowheads in the images indicate the locations of these cells.

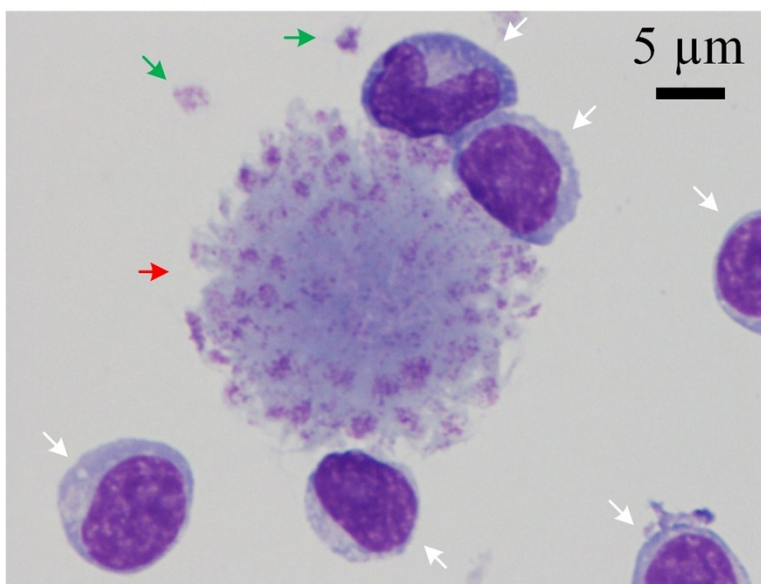

**Supplementary Figure 2. Bright-field image of a mixture of single platelets, aggregated platelets, and white blood cells.** The blood sample was stained with May Giemsa. The green, red, and white arrowheads in the image indicate the locations of single platelets, aggregated platelets, and white blood cells, respectively.

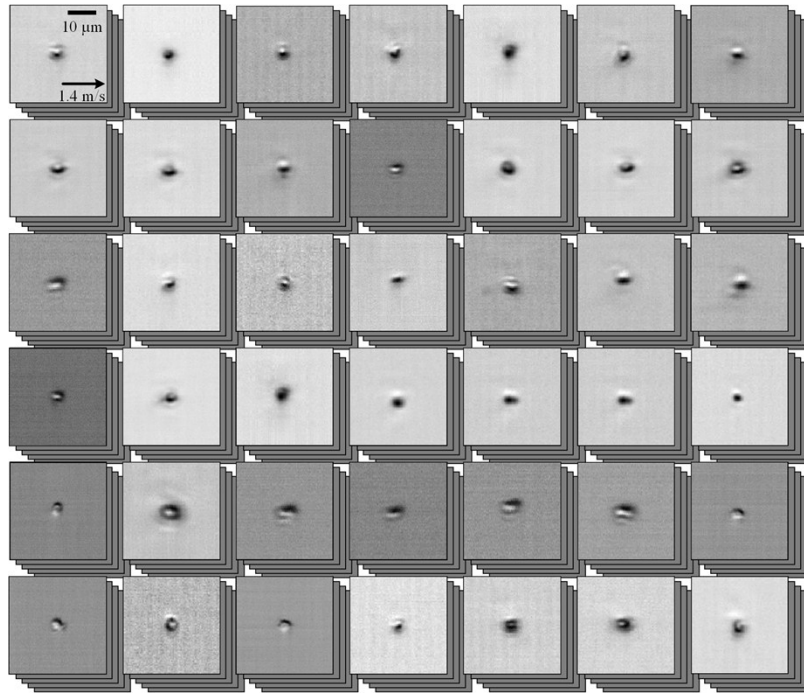

**Supplementary Figure 3. Image library of platelets detected by the optofluidic time-stretch microscope.** The total number of images that show single platelets is 920. The images were recorded at a flow speed of 1.4 m/s, corresponding to a high throughput of 10,000 cells/s.

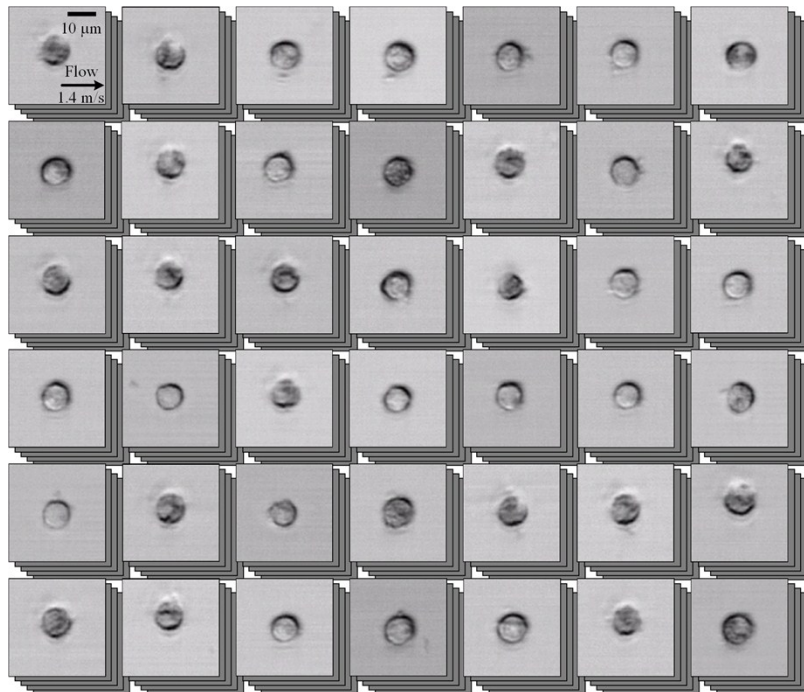

**Supplementary Figure 4. Image library of white blood cells detected by the optofluidic time-stretch microscope.** The total number of images that show white blood cells is 1,540. The images were recorded at a flow speed of 1.4 m/s, corresponding to a high throughput of 10,000 cells/s.
